# Supplementary material for: COVID-19 Subunit Vaccine with a Combination of TLR1/2 and TLR3 Agonists Induces Robust and Protective Immunity
Source: MDPI journal article supplement (doi:10.3390/vaccines9090957), 2021-08-27
Supplement: s1 [file s1]

## Supplementary Mateiral

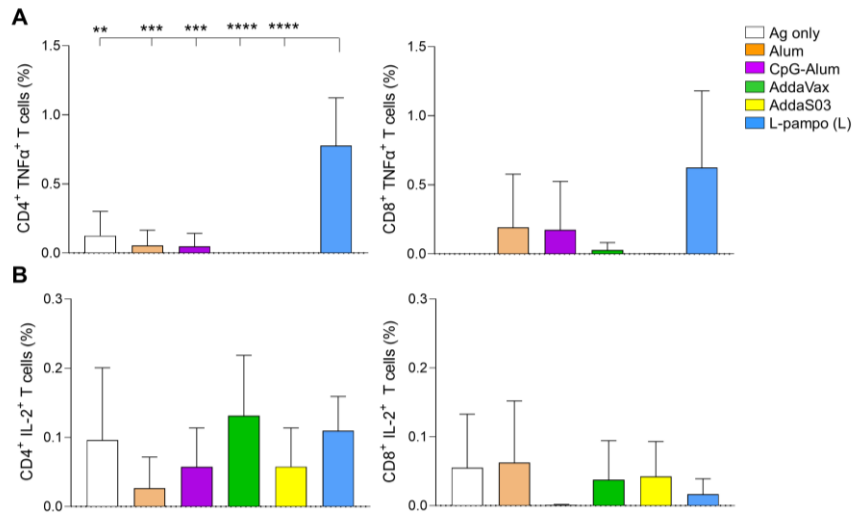

Figure S1. L-pampo increases TNF- $\alpha$ -producing T cells. Related to Figure 3. (A-B) BALB/c mice (total n=42; n=6/antigen only; n=8/Alum, AddaVax, AddaS03 or L-pampo(L); n=4/CpG-Alum) (n=4-8/group) were immunized with RBD-Fc with or without adjuvants i.m. on day 0 and day 21 as described in Figure 3A. At day 35, splenocytes were stimulated with PepMix<sup>TM</sup> SARS-CoV-2 (S-RBD) peptide pool and analyzed TNF- $\alpha$  or IL-2-producing CD4<sup>+</sup> or CD8<sup>+</sup> T cells by using intracellular cytokine assay. (A) Percentage of TNF- $\alpha$ -producing CD4<sup>+</sup> or CD8<sup>+</sup> T cells. (B) Percentage of IL-2-producing CD4<sup>+</sup> or CD8<sup>+</sup> T cells. Data shown are mean  $\pm$  SEM. Data reflect 2 independent experiments. Asterisks indicates statistically significant differences in comparison to the L-pampo (L). \*\*p < 0.01, \*\*\*p < 0.001, \*\*\*\*p < 0.0001, one way ANOVA with Tukey's test.

Table S1. Detailed values of each group in Figures 1D and 2A-2B.

|                                       | Group       | Sample1  | Sample2  | Sample3  | Sample4  | Sample5  | Sample6   | Sample7  | Sample8  |
|---------------------------------------|-------------|----------|----------|----------|----------|----------|-----------|----------|----------|
| <b>Figure 1D</b>                      | Ag only     | 164.5    | 0.0      | 9471.9   | 316.8    | 668.8    | 610.2     | 0.0      | 5300.0   |
| <b>(Total Ab)</b>                     | Alum        | 15015.6  | 617.2    | 0.0      | 0.0      | 6284.4   | 0.0       | 264.1    | 938.3    |
| (GMT)                                 | AddaVax     | 126718.8 | 87968.8  | 68046.9  | 112656.3 | 136093.8 | 356562.5  | 21171.9  | 87968.8  |
|                                       | AddaS03     | 328437.5 | 33437.5  | 102031.3 | 73906.3  | 12671.9  | 173593.8  | 157187.5 | 85625.0  |
|                                       | L-pampo (L) | 694375.0 | 75078.1  | 194687.5 | 328437.5 | 328437.5 | 24875.0   | 276875.0 | 98515.6  |
|                                       | L-pampo (H) | 133750.0 | 380000.0 | 276875.0 | 79765.6  | 230000.0 | 290937.5  | 143125.0 | 171250.0 |
| <b>Figure 1D</b>                      | Ag only     | 223.0    | 100.0    | 200.0    | 610.2    | 2768.8   | 4784.4    | 996.9    | 16187.5  |
| <b>(RBD IgG1)</b>                     | Alum        | 19703.1  | 164.5    | 200.0    | 250.0    | 7625.0   | 123.4     | 1173.4   | 4456.3   |
| (GMT)                                 | AddaVax     | 287500.0 | 181835.9 | 161328.1 | 275781.3 | 488125.0 | 1416250.0 | 68046.9  | 290937.5 |
|                                       | AddaS03     | 563281.3 | 68945.3  | 255078.1 | 137890.6 | 50468.8  | 441250.0  | 516250.0 | 244062.5 |
|                                       | L-pampo (L) | 973437.5 | 16132.8  | 145468.8 | 403281.3 | 124375.0 | 75078.1   | 544375.0 | 262812.5 |
|                                       | L-pampo (H) | 234531.3 | 262656.3 | 567343.8 | 36953.1  | 124375.0 | 1013125.0 | 143125.0 | 610000.0 |
| <b>Figure 1D</b>                      | Ag only     | 0.0      | 0.0      | 410.5    | 0.0      | 0.0      | 0.0       | 0.0      | 0.0      |
| <b>(RBD IgG2a)</b>                    | Alum        | 2346.9   | 0.0      | 0.0      | 0.0      | 0.0      | 0.0       | 0.0      | 0.0      |
| (GMT)                                 | AddaVax     | 6425.0   | 1008.6   | 1043.8   | 2206.3   | 4515.6   | 4457.0    | 1937.5   | 680.5    |
|                                       | AddaS03     | 33312.5  | 346.1    | 1314.1   | 2721.9   | 328.5    | 3460.9    | 3285.2   | 868.0    |
|                                       | L-pampo (L) | 89125.0  | 52562.5  | 110687.5 | 91000.0  | 97531.3  | 2406.3    | 108312.5 | 5984.4   |
|                                       | L-pampo (H) | 10320.3  | 73187.5  | 42250.0  | 11500.0  | 86796.9  | 19703.1   | 97062.5  | 104093.8 |
| <b>Figure 1D</b>                      | Ag only     | 0.0      | 0.0      | 645.3    | 0.0      | 0.0      | 0.0       | 0.0      | 246.5    |
| <b>(RBD IgG2b)</b>                    | Alum        | 2956.3   | 0.0      | 0.0      | 0.0      | 246.5    | 0.0       | 463.3    | 0.0      |
| (GMT)                                 | AddaVax     | 29921.9  | 1103.1   | 2253.1   | 6171.9   | 6284.4   | 10221.9   | 310.9    | 1571.9   |
|                                       | AddaS03     | 70390.6  | 1829.7   | 2768.8   | 15253.9  | 269.9    | 6171.9    | 6757.8   | 5585.9   |
|                                       | L-pampo (L) | 96171.9  | 16718.8  | 59843.8  | 140781.3 | 100859.4 | 1454.7    | 78593.8  | 10859.4  |
|                                       | L-pampo (H) | 20527.3  | 56328.1  | 119687.5 | 21699.2  | 85625.0  | 53984.4   | 36367.2  | 26992.2  |
| <b>Figure 2A</b>                      | Ag only     | 16.0     | 10.0     | 3.0      | 15.0     | 4.0      | 2.0       | 5.0      | 4.0      |
| <b>(IFN-<math>\gamma</math> SFCs)</b> | Alum        | 21.0     | 7.0      | 10.0     | 13.0     | 11.0     | 6.0       | 14.0     | 12.0     |
| (No.)                                 | AddaVax     | 15.0     | 34.0     | 25.0     | 19.0     | 30.0     | 63.0      | 16.0     | 16.0     |
|                                       | AddaS03     | 39.0     | 13.0     | 29.0     | 17.0     | 21.0     | 19.0      | 17.0     | 10.0     |
|                                       | L-pampo (L) | 220.0    | 38.0     | 44.0     | 77.0     | 80.0     | 63.0      | 108.0    | 62.0     |
|                                       | L-pampo (H) | 31.0     | 42.0     | 151.0    | 47.0     | 225.0    | 57.0      | 149.0    | 60.0     |
| <b>Figure 2B</b>                      | Ag only     | 650.8    | 923.8    | 634.0    | 783.3    | 492.0    | 975.0     | 1052.3   |          |
| <b>((IFN-<math>\gamma</math>))</b>    | Alum        | 631.5    | 845.3    | 542.8    | 2614.0   | 2299.0   | 2198.0    | 1324.7   |          |
| (pg/ml)                               | AddaVax     | 1218.8   | 4665.3   | 3660.0   | 5523.0   | 3785.7   | 3597.7    | 3849.6   |          |
|                                       | AddaS03     | 3732.8   | 4418.5   | 2646.8   | 2291.3   | 2935.7   | 2528.3    | 3932.3   |          |
|                                       | L-pampo (L) | 11975.0  | 11206.3  | 10762.8  | 7886.0   | 10782.7  | 5742.0    | 4109.0   |          |
|                                       | L-pampo (H) | 8188.3   | 14719.3  | 14482.3  | 12433.7  | 7919.3   | 6473.3    | 8068.3   |          |

Table S2. Detailed values of each group in Figures 3D and 4A-4B.

|                                       | Group       | Sample1 | Sample2  | Sample3 | Sample4 | Sample5  | Sample6  | Sample7  | Sample8 |
|---------------------------------------|-------------|---------|----------|---------|---------|----------|----------|----------|---------|
| <b>Figure 3D</b>                      | Ag only     | 2251.6  | 3190.6   | 252.3   | 0.0     | 269.9    | 439.8    |          |         |
| <b>(Total Ab)</b>                     | Alum        | 9851.6  | 10796.9  | 9500.0  | 6570.3  | 668.8    | 4457.0   | 0.0      | 586.7   |
| (GMT)                                 | CpG-Alum    | 80937.5 | 112656.3 | 89140.6 | 79765.6 |          |          |          |         |
|                                       | AddaVax     | 52812.5 | 12343.8  | 82109.4 | 63359.4 | 71562.5  | 86796.9  | 28156.3  | 70390.6 |
|                                       | AddaS03     | 11757.8 | 22890.6  | 21718.8 | 21718.8 | 72687.5  | 110187.5 | 40812.5  | 17593.8 |
|                                       | L-pampo (L) | 39296.9 | 35781.3  | 43398.4 | 26992.2 | 147812.5 | 112656.3 | 71562.5  | 26406.3 |
| <b>Figure 3D</b>                      | Ag only     | 0.0     | 0.0      | 504.3   | 0.0     | 123.4    | 1150.0   |          |         |
| <b>(RBD IgG1)</b>                     | Alum        | 6101.6  | 7742.2   | 8328.1  | 4398.4  | 926.6    | 7268.8   | 0.0      | 1126.6  |
| (GMT)                                 | CpG-Alum    | 79765.6 | 117343.8 | 80937.5 | 70390.6 |          |          |          |         |
|                                       | AddaVax     | 41054.7 | 10585.9  | 78593.8 | 72734.4 | 102031.3 | 136093.8 | 65703.1  | 92656.3 |
|                                       | AddaS03     | 11171.9 | 22890.6  | 24648.4 | 26992.2 | 107375.0 | 102031.3 | 87687.5  | 52062.5 |
|                                       | L-pampo (L) | 24648.4 | 18203.1  | 58671.9 | 51601.6 | 102031.3 | 122031.3 | 119687.5 | 43984.4 |
| <b>Figure 3D</b>                      | Ag only     | 0.0     | 0.0      | 0.0     | 0.0     | 0.0      | 0.0      |          |         |
| <b>(RBD IgG2a)</b>                    | Alum        | 135.2   | 199.6    | 170.3   | 158.6   | 0.0      | 0.0      | 0.0      | 0.0     |
| (GMT)                                 | CpG-Alum    | 13609.4 | 6101.6   | 10203.1 | 16187.5 |          |          |          |         |
|                                       | AddaVax     | 7625.0  | 428.1    | 1234.4  | 1585.9  | 4632.8   | 2406.3   | 486.7    | 539.5   |
|                                       | AddaS03     | 228.9   | 516.0    | 457.4   | 357.8   | 1220.3   | 926.6    | 668.8    | 504.3   |
|                                       | L-pampo (L) | 6101.6  | 9265.6   | 4632.8  | 4925.8  | 34718.8  | 9148.4   | 13375.0  | 6921.9  |
| <b>Figure 3D</b>                      | Ag only     | 0.0     | 0.0      | 0.0     | 0.0     | 0.0      | 0.0      |          |         |
| <b>(RBD IgG2b)</b>                    | Alum        | 141.0   | 123.4    | 158.6   | 117.6   | 0.0      | 146.9    | 0.0      | 0.0     |
| (GMT)                                 | CpG-Alum    | 6921.9  | 5394.5   | 4046.9  | 6687.5  |          |          |          |         |
|                                       | AddaVax     | 9031.3  | 645.3    | 3168.0  | 1996.1  | 4695.3   | 2585.9   | 868.0    | 727.3   |
|                                       | AddaS03     | 381.3   | 832.8    | 680.5   | 938.3   | 1320.3   | 1261.7   | 1203.1   | 793.0   |
|                                       | L-pampo (L) | 3285.2  | 5101.6   | 4281.3  | 2640.6  | 8562.5   | 11031.3  | 9382.8   | 7742.2  |
| <b>Figure 4A</b>                      | Ag only     | 14.0    | 22.0     | 3.0     | 11.0    | 7.0      | 4.0      |          |         |
| <b>(IFN-<math>\gamma</math> SFCs)</b> | Alum        | 39.0    | 35.0     | 37.0    | 10.0    | 0.0      | 5.0      | 17.0     | 6.0     |
| (No.)                                 | CpG-Alum    | 37.0    | 52.0     | 69.0    | 50.0    |          |          |          |         |
|                                       | AddaVax     | 54.0    | 40.0     | 32.0    | 27.0    | 45.0     | 17.0     | 42.0     | 2.0     |
|                                       | AddaS03     | 2.0     | 22.0     | 34.0    | 37.0    | 33.0     | 14.0     | 20.0     | 10.0    |
|                                       | L-pampo (L) | 32.0    | 62.0     | 70.0    | 69.0    | 82.0     | 46.0     | 82.0     | 18.0    |
| <b>Figure 4B</b>                      | Ag only     | 305.8   | 479.0    | 331.0   | 291.3   | 435.8    | 240.2    | 1052.3   |         |
| <b>((IFN-<math>\gamma</math>))</b>    | Alum        | 866.0   | 723.3    | 720.0   | 136.5   | 240.5    | 288.9    | 463.2    | 328.5   |
| (pg/ml)                               | CpG-Alum    | 2201.0  | 2914.5   | 3160.3  | 2215.3  |          |          |          |         |
|                                       | AddaVax     | 1533.5  | 795.0    | 676.0   | 694.8   | 1781.1   | 969.0    | 1382.8   | 830.8   |
|                                       | AddaS03     | 497.9   | 937.3    | 1074.3  | 990.3   | 2853.2   | 843.8    | 1262.8   | 626.3   |
|                                       | L-pampo (L) | 1586.8  | 2469.5   | 2818.3  | 2994.8  | 8062.1   | 2665.3   | 7742.3   | 2853.7  |
